# Supplementary material
Source: publisher figshare collection journal article supplement (https://acs.figshare.com/ndownloader/files/14087078)
Supplement: Supplementary file 1 [file 14087078]

## Supporting Information

### **Room-temperature tandem condensation-hydrogenation catalyzed by C<sub>3</sub>N<sub>4</sub> nanosheet-supported Pd nanoparticles**

Renfeng Nie,<sup>a,\*</sup> Minda Chen,<sup>b</sup> Yuchen Pei,<sup>c</sup> Biying Zhang,<sup>b</sup> Long Qi,<sup>c</sup> Jingwen Chen,<sup>b,d</sup> Tian Wei Goh,<sup>b</sup> Zhiyuan Qi,<sup>b</sup> Zhiguo Zhang,<sup>d</sup> and Wenyu Huang<sup>\*b,c</sup>

<sup>a</sup> School of Chemistry and Chemical Engineering, Hubei University, Wuhan 430062, China

<sup>b</sup> Department of Chemistry, Iowa State University, Ames, IA 50011, USA

<sup>c</sup> Ames Laboratory, US Department of Energy, Iowa State University, Ames, IA 50011, USA

<sup>d</sup> Key Laboratory of Biomass Chemical Engineering of Ministry of Education, College of Chemical and Biological Engineering, Zhejiang University, Hangzhou 310027, China

#### **Corresponding Authors**

\*E-mail: refinenie@163.com

\*E-mail: whuang@iastate.edu

Number of pages (8)

Figures (S1-S14)

Tables (S1-S6)

## Characterizations

Powder X-ray diffraction (XRD) was performed on a Bruker D8A25 diffractometer with Cu  $K\alpha$  radiation ( $\lambda = 1.54184 \text{ \AA}$ ) operating at 30 kV and 25 mA.  $N_2$  adsorption was carried out at  $-196 \text{ }^\circ\text{C}$  using an auto-adsorption analyzer (Micromeritics, 3Flex). Before adsorption measurements were taken, the samples were degassed at  $250 \text{ }^\circ\text{C}$  overnight. The total pore volume was determined from the aggregation of  $N_2$  vapor adsorbed at a relative pressure of 0.99. The specific surface area was calculated using the BET method, and the pore size distributions were measured using BJH analysis from the desorption branch of the isotherms. X-ray photoelectron spectra (XPS) were recorded on a PerkinElmer PHI ESCA system. Transmission electron microscopy (TEM) images were acquired using a Tecnai G2 F20 electron microscope operated at 200 kV. Inductively coupled plasma mass spectroscopy (ICP-MS, X Series II, Thermo Scientific) was performed to determine the actual palladium content in catalysts. The samples were dissolved in perchloric acid under boiling until the solid was completely dissolved.

$CO_2$  Temperature Programmed Desorption (TPD) experiments were carried out on a Micromeritics 3Flex instrument equipped with a mass spec detector. Typically, the sample (ca.100 mg) was pretreated under a flow of He (50 mL/min) at  $200 \text{ }^\circ\text{C}$  for 1 h. Then the sample was cooled to RT under a flow of He and adsorbed  $CO_2$  for 30 min. Then the sample was purged with He (50 mL/min) at RT for 30 min. The TPD data were collected from RT to  $400 \text{ }^\circ\text{C}$  at a heating rate of  $10 \text{ }^\circ\text{C}/\text{min}$  in a flow of He.

CO chemisorption was conducted at  $35 \text{ }^\circ\text{C}$  using the Micromeritics 3Flex instrument. The first isotherm was performed after evacuation at  $200 \text{ }^\circ\text{C}$  for 30 min using a turbomolecular pump. Subsequently, the second isotherm was conducted after evacuation at  $35 \text{ }^\circ\text{C}$  for 1 h. The difference between the two isotherms extrapolated to zero pressure gave the amount of the irreversibly adsorbed CO.

**Table S1.** Pore structure of  $C_3N_4$ -based materials.

| Samples          | $S_{BET}$ ( $m^2/g$ ) | $V_{pore}$ ( $cm^3/g$ ) | $D_p$ (nm) |
|------------------|-----------------------|-------------------------|------------|
| $C_3N_4$         | 16                    | 0.078                   | 12         |
| $C_3N_4-NH_2$    | 138                   | 0.550                   | 43         |
| $Pd/C_3N_4-NH_2$ | 118                   | 0.486                   | 36         |

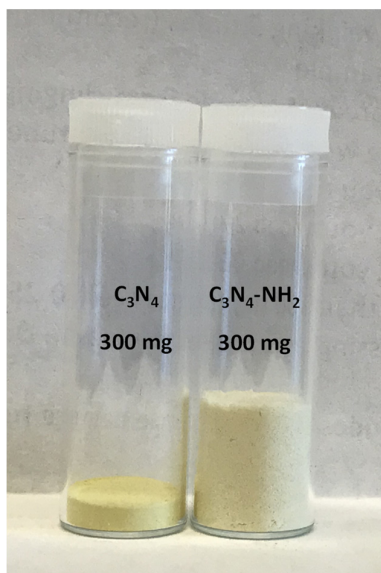

**Figure S1.** Digital photographs of  $C_3N_4$  and  $C_3N_4-NH_2$ .

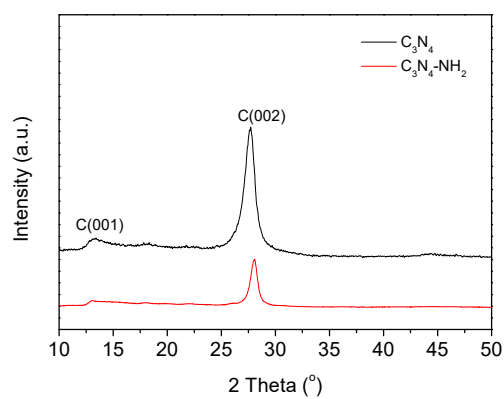

**Figure S2.** XRD patterns of  $C_3N_4$ -based materials.

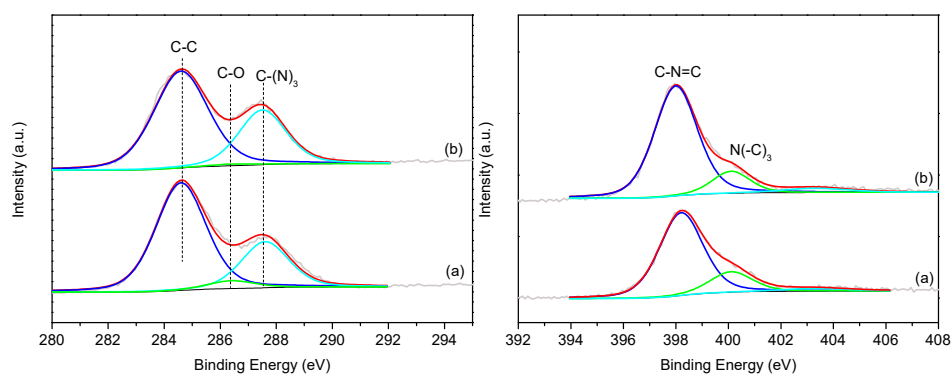

**Figure S3.**  $C1s$  and  $N1s$  XPS spectra of (a)  $Pd/C_3N_4$  and (b)  $Pd/C_3N_4-NH_2$ .

**Table S2.** Surface composition of Pd/C<sub>3</sub>N<sub>4</sub> and Pd/C<sub>3</sub>N<sub>4</sub>-NH<sub>2</sub> catalysts calculated from XPS.

| Catalysts                                         | C atom composition (%) |     |                    |
|---------------------------------------------------|------------------------|-----|--------------------|
|                                                   | C-C                    | C-O | C-(N) <sub>3</sub> |
| Pd/C <sub>3</sub> N <sub>4</sub>                  | 69.8                   | 4.7 | 25.5               |
| Pd/C <sub>3</sub> N <sub>4</sub> -NH <sub>2</sub> | 64.3                   | 0.9 | 34.7               |

**Table S3.** Element composition of Pd/C<sub>3</sub>N<sub>4</sub> and Pd/C<sub>3</sub>N<sub>4</sub>-NH<sub>2</sub> catalysts.

| Catalysts                                         | Surface atom composition (%) <sup>a</sup> |     |      |      | Pd loading (wt%) <sup>b</sup> | D <sub>Pd</sub> (%) <sup>c</sup> | d <sub>Pd</sub> (nm) <sup>c</sup> |
|---------------------------------------------------|-------------------------------------------|-----|------|------|-------------------------------|----------------------------------|-----------------------------------|
|                                                   | C                                         | O   | N    | Pd   |                               |                                  |                                   |
| Pd/C <sub>3</sub> N <sub>4</sub>                  | 73.8                                      | 8.3 | 15.0 | 0.39 | 2.3                           | 16.7                             | 6.7                               |
| Pd/C <sub>3</sub> N <sub>4</sub> -NH <sub>2</sub> | 67.1                                      | 7.5 | 22.8 | 0.33 | 2.4                           | 28.9                             | 3.9                               |

<sup>a</sup> Atomic concentrations were detected in XPS analysis.<sup>b</sup> Detected *via* ICP, the value was the percentage of Pd relative to the mass of C.<sup>c</sup> Detected by CO chemisorption.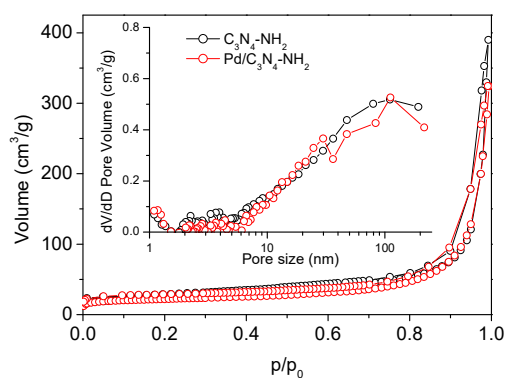**Figure S4.** N<sub>2</sub> sorption isotherms and the size distributions of C<sub>3</sub>N<sub>4</sub>-NH<sub>2</sub> and Pd/C<sub>3</sub>N<sub>4</sub>-NH<sub>2</sub>.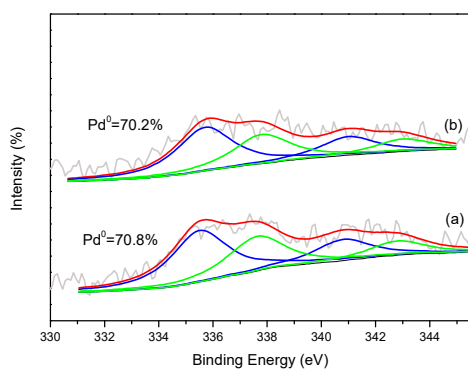**Figure S5.** Pd 3d XPS spectra of (a) Pd/C<sub>3</sub>N<sub>4</sub> and (b) Pd/C<sub>3</sub>N<sub>4</sub>-NH<sub>2</sub>.

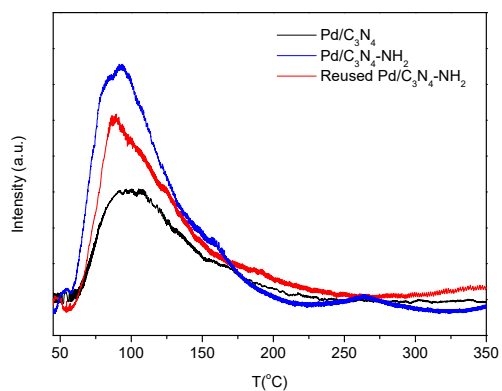

**Figure S6.** CO<sub>2</sub>-TPD profiles of Pd/C<sub>3</sub>N<sub>4</sub>, Pd/C<sub>3</sub>N<sub>4</sub>-NH<sub>2</sub> and reused Pd/C<sub>3</sub>N<sub>4</sub>-NH<sub>2</sub> catalysts.

**Table S4.** Basicity measured by CO<sub>2</sub>-TPD and surface N composition measured by XPS for Pd/C<sub>3</sub>N<sub>4</sub>, Pd/C<sub>3</sub>N<sub>4</sub>-NH<sub>2</sub> and reused Pd/C<sub>3</sub>N<sub>4</sub>-NH<sub>2</sub> catalysts.

| Catalysts                                                | Basicity by CO <sub>2</sub> -TPD<br>( $\mu\text{mol/g}$ ) | N atom composition (%) |                    |     |
|----------------------------------------------------------|-----------------------------------------------------------|------------------------|--------------------|-----|
|                                                          |                                                           | C-N=C                  | N(-C) <sub>3</sub> | N-O |
| Pd/C <sub>3</sub> N <sub>4</sub>                         | 42.0                                                      | 77.5                   | 18.7               | 3.8 |
| Pd/C <sub>3</sub> N <sub>4</sub> -NH <sub>2</sub>        | 72.9                                                      | 80.9                   | 14.2               | 4.9 |
| Reused Pd/C <sub>3</sub> N <sub>4</sub> -NH <sub>2</sub> | 64.4                                                      | 81.8                   | 14.9               | 3.3 |

**Table S5.** One-step condensation-hydrogenation towards cyclohexanone over 5%Pd/C<sub>3</sub>N<sub>4</sub>-NH<sub>2</sub>.

| Entry | Catalyst                                            | T<br>(h) | H <sub>2</sub><br>(MPa) | Con.<br>(%) | Selectivity (%) |      |    | P2 Yield<br>(%) |
|-------|-----------------------------------------------------|----------|-------------------------|-------------|-----------------|------|----|-----------------|
|       |                                                     |          |                         |             | P1              | P2   | P3 |                 |
| 1     | 5%Pd/C <sub>3</sub> N <sub>4</sub> -NH <sub>2</sub> | 4        | 2                       | 88.1        | 44.8            | 55.2 | 0  | 39.5            |

Reaction conditions: Catalyst (2.5 mg), cyclohexanone (0.1 mmol), malononitrile (0.2 mmol), EtOH (2mL), 23 °C.

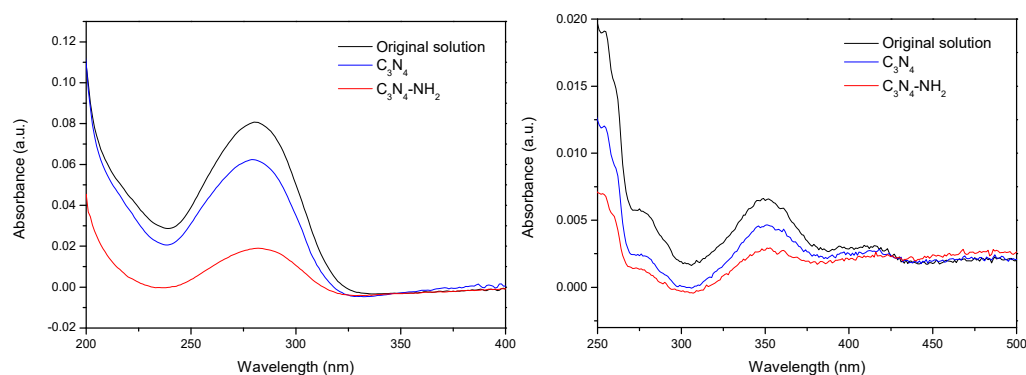

**Figure S7.** UV-vis spectra of (a) cyclohexanone and (b) malononitrile adsorption on C<sub>3</sub>N<sub>4</sub> and C<sub>3</sub>N<sub>4</sub>-NH<sub>2</sub>.

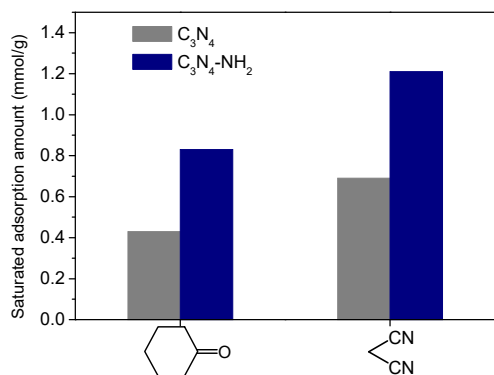

**Figure S8.** The saturated adsorption amount of cyclohexanone and malononitrile over C<sub>3</sub>N<sub>4</sub> and C<sub>3</sub>N<sub>4</sub>-NH<sub>2</sub>.

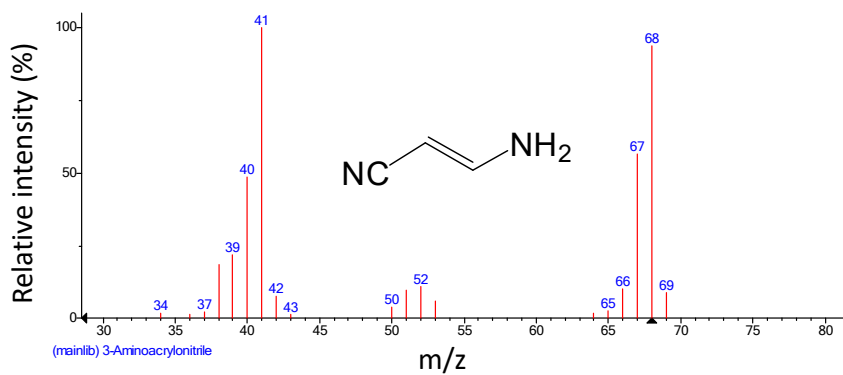

**Figure S9.** The MS analysis of byproduct from hydrogenation of malononitrile during one-step condensation-hydrogenation. Reaction conditions: Pd/C<sub>3</sub>N<sub>4</sub>-NH<sub>2</sub> (5mg), cyclohexanone (0.1 mmol), malononitrile (0.2 mmol), EtOH (2mL), 50 °C, 2 MPa H<sub>2</sub>, 4h.

**Table S6.** One-step condensation-hydrogenation at low hydrogen pressure over Pd/C<sub>3</sub>N<sub>4</sub>-NH<sub>2</sub>.

| Entry | Catalyst                                          | T<br>(h) | H <sub>2</sub><br>(MPa) | Con.<br>(%) | Selectivity (%) |      |    | P2 Yield<br>(%) |
|-------|---------------------------------------------------|----------|-------------------------|-------------|-----------------|------|----|-----------------|
|       |                                                   |          |                         |             | P1              | P2   | P3 |                 |
| 1     | Pd/C <sub>3</sub> N <sub>4</sub> -NH <sub>2</sub> | 2        | 0.5                     | 89.4        | 47.9            | 52.1 | 0  | 46.6            |
| 2     | Pd/C <sub>3</sub> N <sub>4</sub> -NH <sub>2</sub> | 28       | 0.5                     | 99.8        | 4.5             | 95.5 | 0  | 95.3            |

Reaction conditions: Catalyst (5 mg), cyclohexanone (0.1 mmol), malononitrile (0.2 mmol), EtOH (2mL), 23 °C.

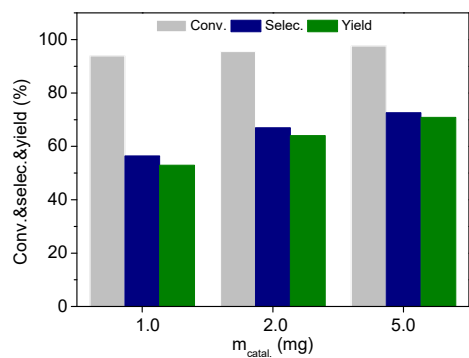

**Figure S10.** Catalyst loading effect on one-step condensation-hydrogenation reaction. Reaction conditions: Pd/C<sub>3</sub>N<sub>4</sub>-NH<sub>2</sub>, cyclohexanone 0.1 mmol, malononitrile 0.2 mmol, EtOH 2mL, 2 MPa H<sub>2</sub>, 23 °C, 2h.

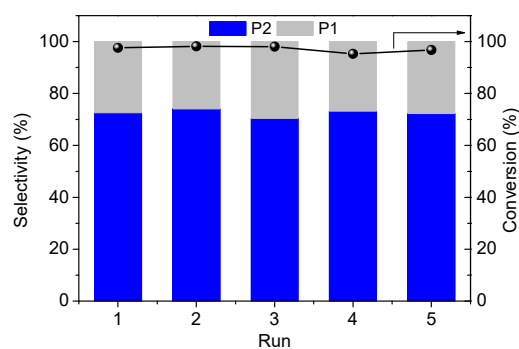

**Figure S11.** Recycling of Pd/C<sub>3</sub>N<sub>4</sub>-NH<sub>2</sub> for one-step condensation-hydrogenation reaction. Reaction conditions: catalyst (5mg), cyclohexanone (0.1 mmol), malononitrile (0.2 mmol), EtOH (2mL), 2 MPa H<sub>2</sub>, 23 °C, 2h.

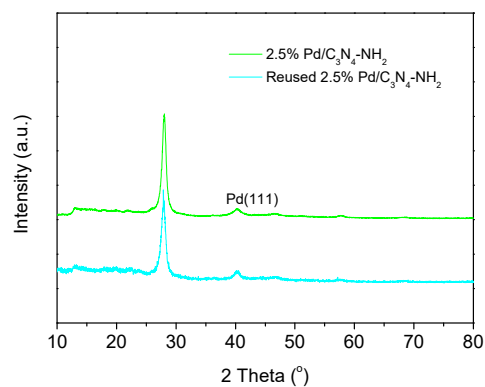

**Figure S12.** XRD patterns of fresh Pd/C<sub>3</sub>N<sub>4</sub>-NH<sub>2</sub> and reused Pd/C<sub>3</sub>N<sub>4</sub>-NH<sub>2</sub> catalysts.

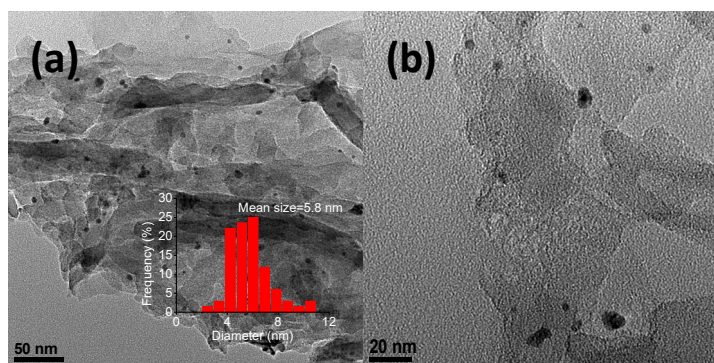

**Figure S13.** TEM images of recycled Pd/C<sub>3</sub>N<sub>4</sub>-NH<sub>2</sub>.

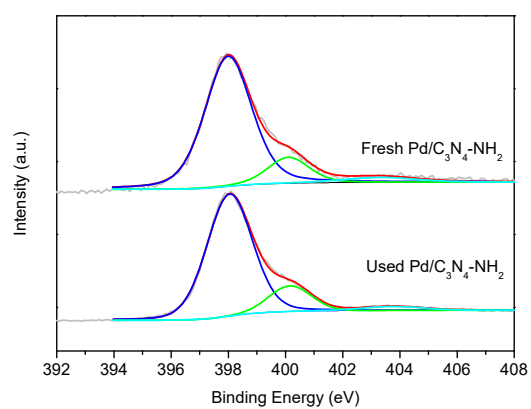

**Figure S14.** N1s spectra of fresh and reused Pd/C<sub>3</sub>N<sub>4</sub>-NH<sub>2</sub> catalysts.
